# Supplementary material
Source: publisher site journal article supplement (http://www.kjim.org/upload/media/kjim-2021-069-suppl3.pdf)
Supplement: Supplementary file 1 [file kjim-2021-069-suppl3.pdf]

**Supplementary Table 3. Comparison of patient characteristics between the derivation and validation groups**

| Variable                                | Derivation group (n = 279) | Validation group (n = 135) | <i>p</i> value |
|-----------------------------------------|----------------------------|----------------------------|----------------|
| Male sex                                | 279 (100.0)                | 135 (100.0)                | NA             |
| Age, yr                                 | 20 (20–21)                 | 20 (19–21)                 | < 0.001        |
| Body mass index, kg/m <sup>2</sup>      | 23.5 (21.8–25.7)           | 23.3 (21.4–26.2)           | 0.797          |
| Duration of smoking, mo                 | 37.5 (12.0–62.5)           | 36.0 (6.0–62.5)            | 0.373          |
| Packs of cigarettes smoked, /day        | 0.5 (0.4–0.8)              | 0.5 (0.3–0.6)              | 0.258          |
| <b>Comorbidities</b>                    |                            |                            |                |
| Allergy                                 | 17 (6.1)                   | 16 (11.9)                  | 0.043          |
| Chronic lung disease                    | 3 (1.1)                    | 5 (30.7)                   | 0.120          |
| History of tuberculosis                 | 2 (0.7)                    | 1 (0.7)                    | > 0.999        |
| Hypertension                            | 2 (0.7)                    | 0                          | > 0.999        |
| <b>Symptom</b>                          |                            |                            |                |
| Onset                                   | 3 (2–4)                    | 3 (2–4)                    | 0.289          |
| Fever                                   | 257 (92.1)                 | 119 (88.2)                 | 0.190          |
| Cough                                   | 254 (91.0)                 | 122 (90.4)                 | 0.825          |
| Sputum                                  | 209 (74.9)                 | 109 (80.7)                 | 0.188          |
| Chills                                  | 149 (53.4)                 | 71 (52.6)                  | 0.877          |
| Sore throat                             | 118 (42.3)                 | 53 (39.3)                  | 0.557          |
| Rhinorrhoea                             | 77 (27.6)                  | 42 (31.1)                  | 0.459          |
| Dyspnea                                 | 68 (24.4)                  | 27 (20.0)                  | 0.321          |
| Chest pain                              | 66 (24.7)                  | 27 (20.0)                  | 0.403          |
| Myalgia                                 | 39 (14.0)                  | 21 (15.6)                  | 0.669          |
| Fatigue                                 | 8 (2.9)                    | 1 (0.7)                    | 0.282          |
| Night sweats                            | 3 (1.1)                    | 3 (2.2)                    | 0.397          |
| Palpitation                             | 1 (0.4)                    | 1 (0.7)                    | 0.546          |
| <b>Laboratory findings</b>              |                            |                            |                |
| White blood cell count, / $\mu$ L       | 7,870 (5,450–11,510)       | 8,160 (5,770–11,340)       | 0.611          |
| Neutrophil count, / $\mu$ L             | 5,570 (3,650–9,090)        | 6,000 (3,840–8,520)        | 0.700          |
| Lymphocyte count, / $\mu$ L             | 1,270 (920–1,630)          | 1,230 (890–1,540)          | 0.266          |
| Eosinophil count, / $\mu$ L             | 30 (10–150)                | 50 (10–170)                | 0.763          |
| Platelet count, $\times 10^3$ / $\mu$ L | 196 (157–244)              | 202 (165–244)              | 0.313          |
| C-reactive protein, mg/dL               | 5.9 (3.4–10.1)             | 50.2 (20.9–90.6)           | 0.398          |
| <b>Chest CT findings</b>                |                            |                            |                |
| Ground glass opacity                    | 232 (83.2)                 | 105 (77.8)                 | 0.188          |
| Consolidation                           | 221 (79.2)                 | 106 (78.5)                 | 0.871          |
| Centrilobular nodules                   | 64 (22.9)                  | 25 (18.5)                  | 0.305          |
| Interlobular septal thickening          | 68 (24.4)                  | 21 (15.6)                  | 0.041          |
| Pleural effusion                        | 36 (12.9)                  | 16 (11.9)                  | 0.762          |
| Bronchovascular bundle thickening       | 21 (7.5)                   | 8 (5.9)                    | 0.550          |
| Bilateral involvement                   | 143 (51.3)                 | 55 (40.7)                  | 0.045          |

Values are presented as number (%) or median (interquartile range). *p* values were calculated according to the chi-square test, Fisher's exact test, or Wilcoxon rank sum test.

NA, not applicable; CT, computed tomography.
